# Supplementary material for: Functionalization of biodegradable hyperbranched poly(α,β-malic acid) as a nanocarrier platform for anticancer drug delivery
Source: Royal Society of Chemistry journal article supplement (doi:10.1039/c4ra13686a), 2015-01-01
Supplement: c4ra13686a1.pdf [file c4ra13686a1.pdf]

### Electronic Supplementary Information (ESI)

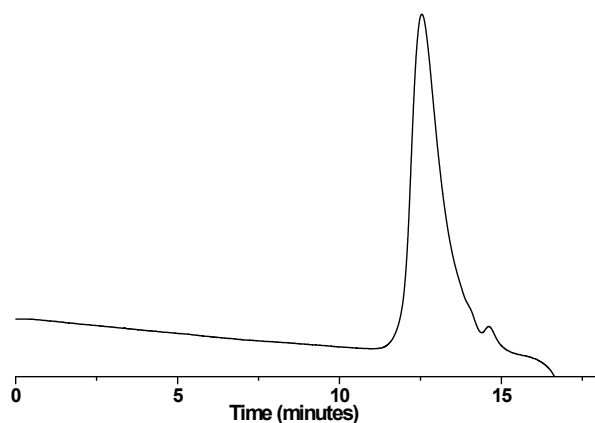

Figure S1. The GPC spectrum of PMA.

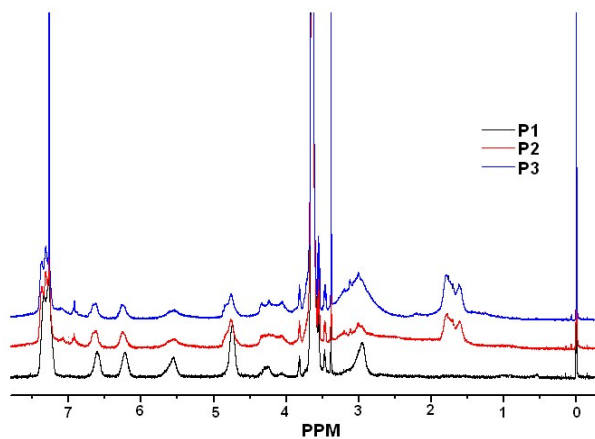

Figure S2. The <sup>1</sup>H NMR spectra of P1, P2, P3.
